# Supplementary material for: Induction chemoimmunotherapy followed by CD8+ immune cell-based patient selection for chemotherapy-free radioimmunotherapy in locally advanced head and neck cancer
Source: PubMed Central journal article supplement — J Immunother Cancer. 2022 Jan 25;10(1):e003747. doi: 10.1136/jitc-2021-003747 (PMC8796267; doi:10.1136/jitc-2021-003747), 2022-01-25
Supplement: jitc-2021-003747supp001.pdf [file jitc-2021-003747supp001.pdf]

**SUPPLEMENTARY MATERIAL****Supplementary Table 1: UICC stage of patients according to the TNM 7<sup>th</sup> edition**

|                                                             | No. (n=79) | %    |
|-------------------------------------------------------------|------------|------|
| <b>UICC stage (according to TNM 7<sup>th</sup> edition)</b> |            |      |
| II                                                          | 1          | (1)  |
| III                                                         | 14         | (18) |
| IVA                                                         | 46         | (58) |
| IVB                                                         | 18         | (23) |

**Supplementary Table 2: Subsequent treatment of patients not entering RIT**

|                                                     | No. (n=19) | %   |
|-----------------------------------------------------|------------|-----|
| Definitive platinum-based radiochemotherapy         | 12         | 63% |
| Surgery followed by radio(chemo)therapy             | 2          | 11% |
| Definitive radiotherapy + Cetuximab                 | 1          | 5%  |
| Definitive radiotherapy + Durvalumab                | 1          | 5%  |
| Definitive radiotherapy                             | 1          | 5%  |
| Chemotherapy                                        | 1          | 5%  |
| No further treatment (patient's refusal due to pCR) | 1*         | 5%  |

\*Patient is still in remission at end of study follow up (2 years).

**Supplementary Table 3: Peripheral blood immune markers associated with RRM (p<0.2)**

| Immune cell subsets       | Unit           | mean of non-RRM | mean of RRM | p-value |
|---------------------------|----------------|-----------------|-------------|---------|
| mDC                       | cells/ $\mu$ l | 11.35           | 14.54       | 0.0086  |
| DC                        | cells/ $\mu$ l | 19.66           | 21.27       | 0.0298  |
| B cells (HLA-DR+)         | %              | 98.17           | 93.68       | 0.0321  |
| DNT                       | cells/ $\mu$ l | 44.45           | 76.68       | 0.0371  |
| mDC-1                     | cells/ $\mu$ l | 0.82            | 1.15        | 0.0573  |
| Neutrophils (HLA-DR+)     | %              | 0.33            | 0.49        | 0.0601  |
| mDC-2                     | cells/ $\mu$ l | 10.39           | 13.14       | 0.0783  |
| T cells (HLA-DRhigh)      | %              | 1.97            | 2.48        | 0.1031  |
| Monocytes (CD14low/CD16+) | cells/ $\mu$ l | 23.83           | 19.90       | 0.1133  |
| T4:T8 ratio               | cells/ $\mu$ l | 2.37            | 1.99        | 0.1281  |
| T helper cells (CD25high) | cells/ $\mu$ l | 4.12            | 5.04        | 0.1383  |
| NKT cells (CD16+)         | cells/ $\mu$ l | 8.81            | 4.45        | 0.1459  |
| Monocytes (CD14low/CD16-) | cells/ $\mu$ l | 0.04            | 0.53        | 0.1645  |

|                            |                |       |       |        |
|----------------------------|----------------|-------|-------|--------|
| pDC                        | cells/ $\mu$ l | 8.49  | 6.86  | 0.1856 |
| Monocytes (CD14high/CD16-) | cells/ $\mu$ l | 82.27 | 78.45 | 0.1966 |

P-value: adjusted by clinical factors (T stage (T4 vs others), HPV/p16, intratumoral CD8+ cell density, programmed cell death ligand 1 (PD-L1), tumor cell area (TC area) and PD-L1 immune cell area (IC area))

**Supplementary Figure 1: Kaplan-Meier analysis of PFS and OS of patients excluded from radioimmunotherapy (n=19).**

Kaplan-Meier estimates of (A) progression-free survival and (B) overall survival of patients that received alternative treatment outside the trial after induction chem-immunotherapy. Tick marks indicate censored observations. Pts, Patients.

**Supplementary Figure 2: Kaplan-Meier estimates of PFS and OS in HPV positive oropharyngeal cancers and other HNSCCs.**

Kaplan-Meier estimates of (A) progression-free survival and (B) overall survival of the radioimmunotherapy cohort divided in p16 positive oropharyngeal cancers and other tumors. Kaplan-Meier estimates of (C) progression-free survival and (D) overall survival of the entire study cohort divided in p16 positive oropharyngeal cancers and other tumors. Tick marks indicate censored observations. RIT, radioimmunotherapy.
