# Supplementary material for: Induction chemoimmunotherapy followed by CD8+ immune cell-based patient selection for chemotherapy-free radioimmunotherapy in locally advanced head and neck cancer
Source: PubMed Central journal article supplement — J Immunother Cancer. 2022 Jan 25;10(1):e003747. doi: 10.1136/jitc-2021-003747 (PMC8796267; doi:10.1136/jitc-2021-003747), 2022-01-25
Supplement: jitc-2021-003747supp002.pdf [file jitc-2021-003747supp002.pdf]

**A Progression-free Survival Excluded Pts.**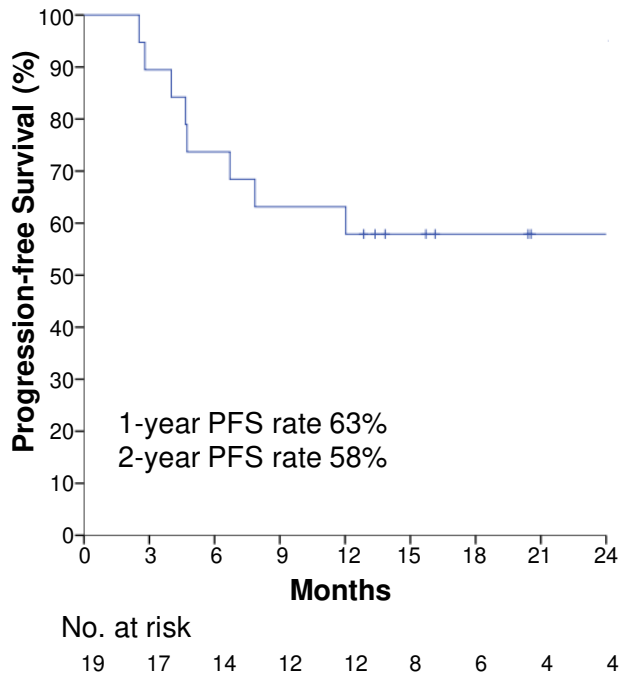**B Overall Survival Excluded Pts.**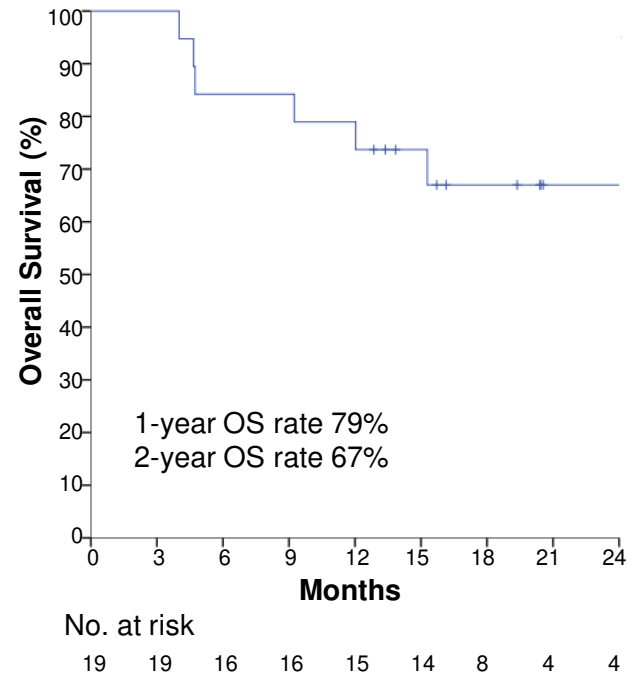**Supplementary Figure 1**
