# Supplementary material for: Induction chemoimmunotherapy followed by CD8+ immune cell-based patient selection for chemotherapy-free radioimmunotherapy in locally advanced head and neck cancer
Source: PubMed Central journal article supplement — J Immunother Cancer. 2022 Jan 25;10(1):e003747. doi: 10.1136/jitc-2021-003747 (PMC8796267; doi:10.1136/jitc-2021-003747), 2022-01-25
Supplement: jitc-2021-003747supp003.pdf [file jitc-2021-003747supp003.pdf]

**A Progression-free Survival RIT cohort**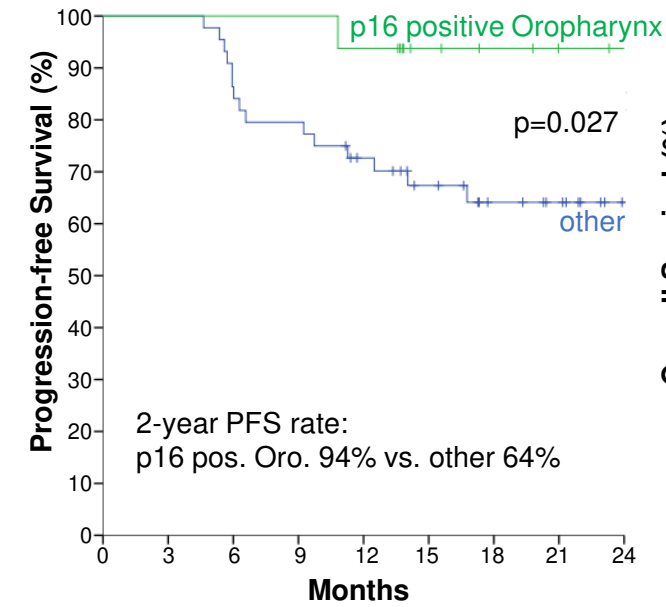

| No. at risk | 0  | 3  | 6  | 9  | 12 | 15 | 18 | 21 | 24 |
|-------------|----|----|----|----|----|----|----|----|----|
| p16 pos.    | 16 | 16 | 16 | 16 | 15 | 10 | 8  | 6  | 5  |
| p16 neg.    | 44 | 44 | 38 | 35 | 29 | 23 | 17 | 14 | 7  |

**B Overall Survival RIT cohort**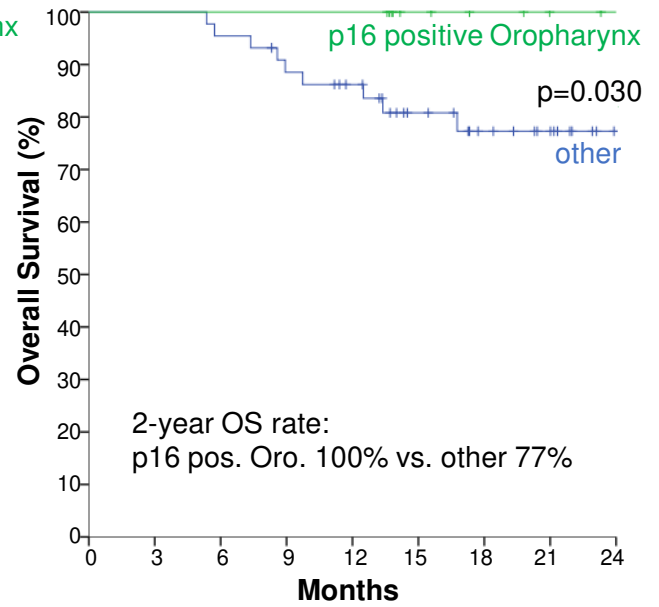

| No. at risk | 0  | 3  | 6  | 9  | 12 | 15 | 18 | 21 | 24 |
|-------------|----|----|----|----|----|----|----|----|----|
| p16 pos.    | 16 | 16 | 16 | 16 | 16 | 11 | 9  | 7  | 6  |
| p16 neg.    | 44 | 44 | 42 | 38 | 34 | 25 | 19 | 15 | 7  |

**C Progression-free Survival entire cohort**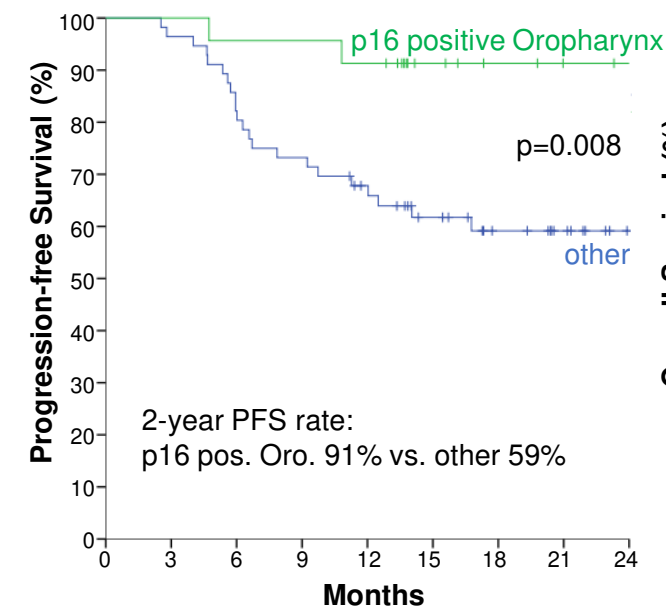

| No. at risk | 0  | 3  | 6  | 9  | 12 | 15 | 18 | 21 | 24 |
|-------------|----|----|----|----|----|----|----|----|----|
| p16 pos.    | 23 | 23 | 22 | 22 | 21 | 14 | 11 | 9  | 8  |
| p16 neg.    | 56 | 54 | 46 | 41 | 35 | 27 | 20 | 15 | 8  |

**D Overall Survival entire cohort**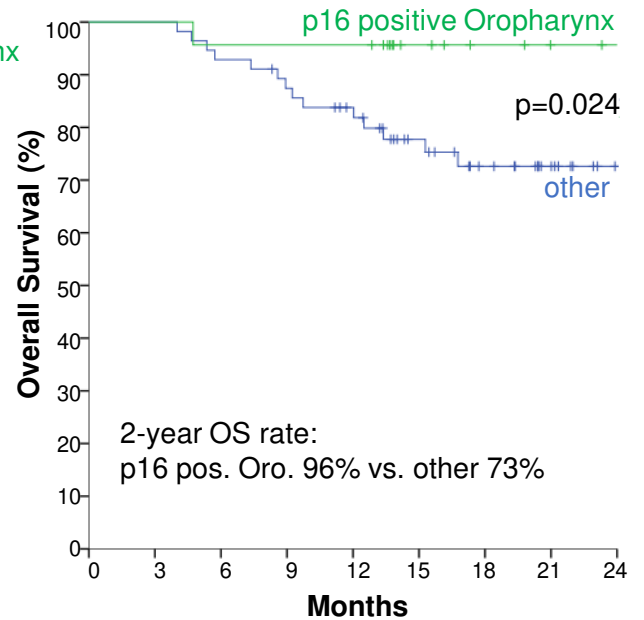

| No. at risk | 0  | 3  | 6  | 9  | 12 | 15 | 18 | 21 | 24 |
|-------------|----|----|----|----|----|----|----|----|----|
| p16 pos.    | 23 | 23 | 22 | 22 | 22 | 15 | 12 | 10 | 9  |
| p16 neg.    | 56 | 56 | 52 | 48 | 43 | 32 | 24 | 16 | 8  |

**Supplementary Figure 2**
